# Supplementary material for: Identification of CmbHLH Transcription Factor Family and Excavation of CmbHLHs Resistant to Necrotrophic Fungus Alternaria in Chrysanthemum
Source: MDPI journal article supplement (doi:10.3390/genes14020275), 2023-01-20
Supplement: s1 [file s1]

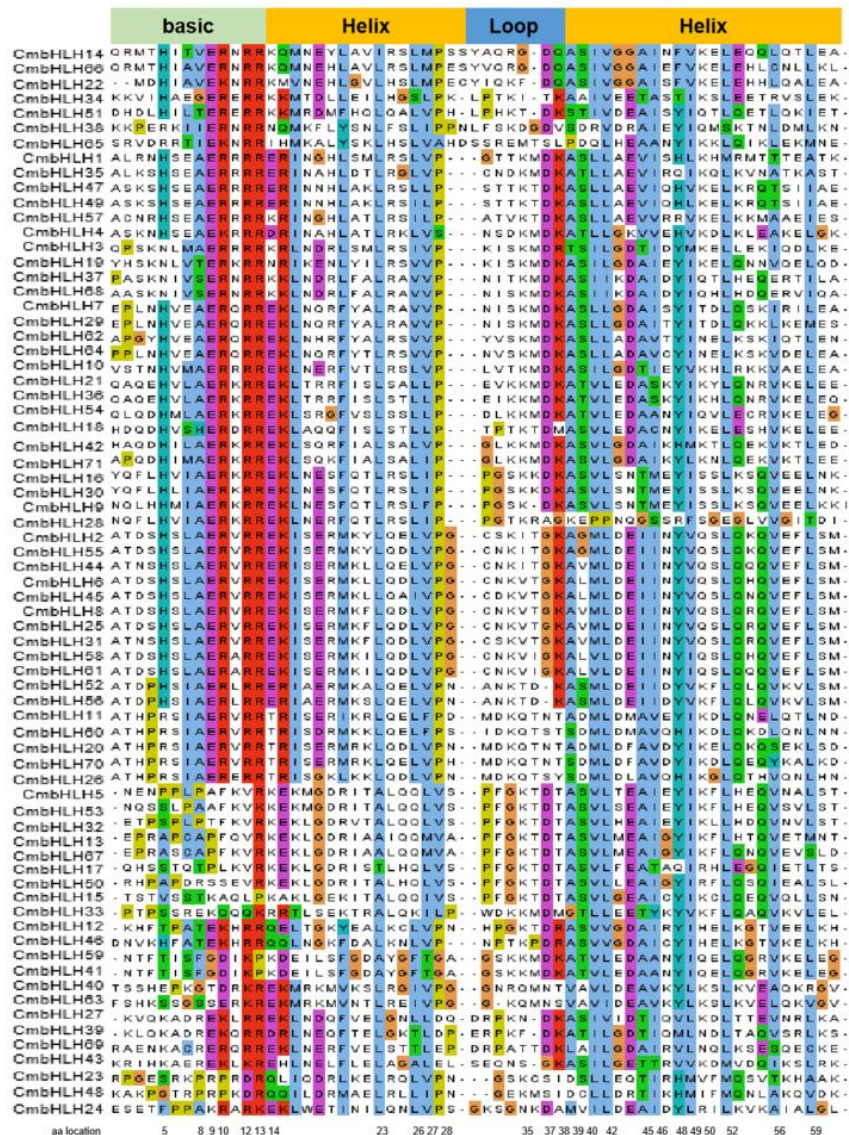

**Figure S1** Multiple sequence alignment of CmbHLH family proteins. The four-color modules at the top of the figure are represented respectively: red represents the N-terminal basic region of bHLH, yellow and green represents two amphiphilic regions, blue represents variable length loop. Process the data into pictures by using Clustal W.



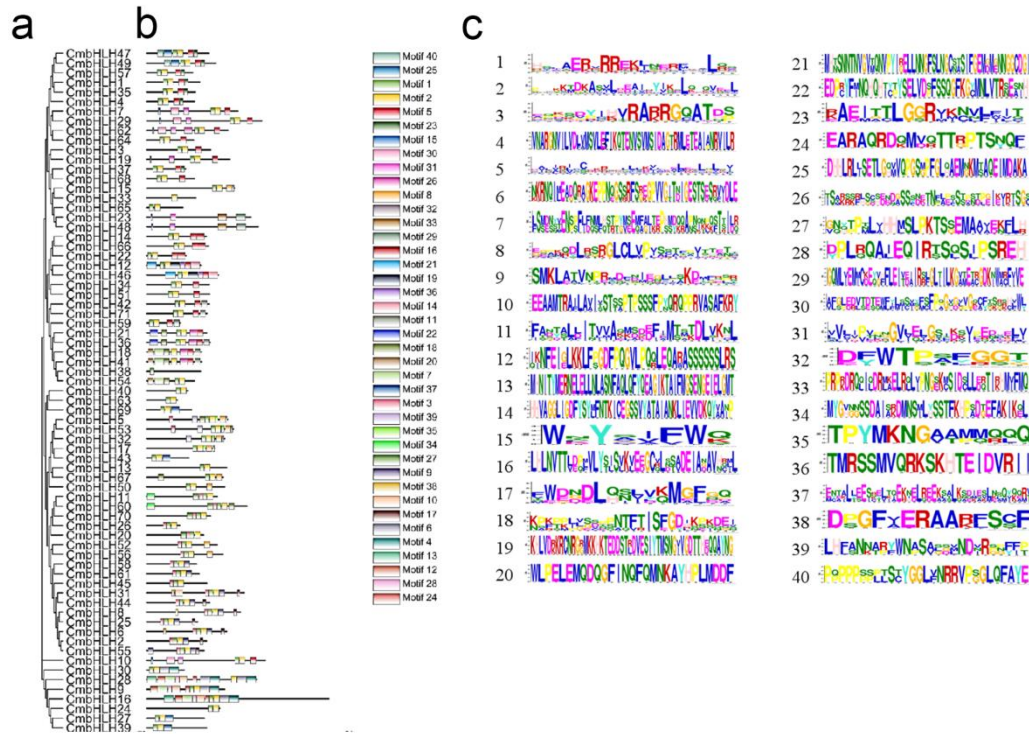

**Figure S2** Motif composition of CmbHLH TF family. (a) Phylogenetic tree of CmbHLHs; (b) Conserved motifs of the CmbHLHs; (c) The sequence composition of each motif in CmbHLHs.

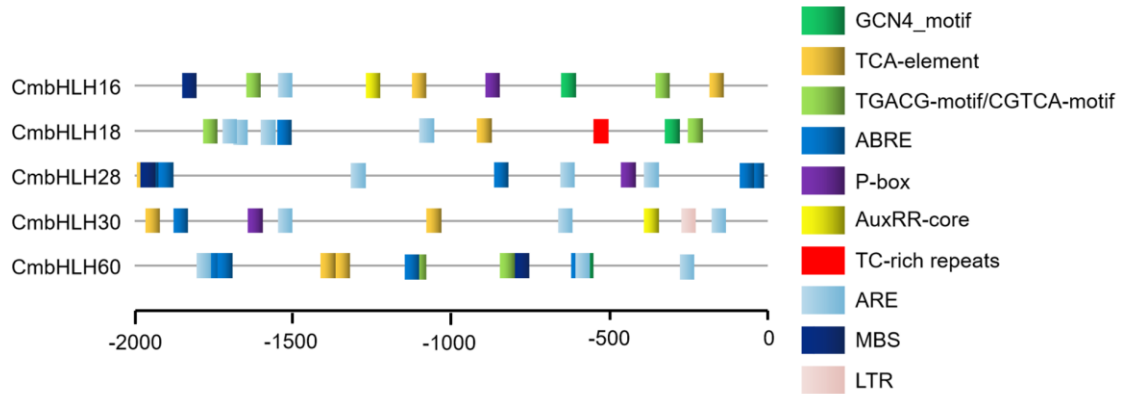

**Figure S3** Visualization of *cis*-elements in the promoter sequences of *CmbHLH* genes. Different colors represent different *cis*-acting elements in the promoter sequences of *CmbHLH* genes.

**Table S1** Promoter sequences of the candidate resistant genes to necrotrophic fungus.

| Promoter sequences of the candidate genes                            |
|----------------------------------------------------------------------|
| > <i>CmbHLH16</i>                                                    |
| TAGTCTTGGTTAGTAAACTTGGCTATTTAAATATGTTGTAAAAGTTGATTAAATATATACACAAG    |
| TATATTGATCGCGCTATTATTTGTTTCATCATTTTTTTATATCACTACTTGATATGATGGTTAAGTTG |
| CAGCATCAACTTGGACATATATTTATCACCACATCCTCAAGTGAATTTTCATGTTGTTTTGAGAT    |
| CTTTCCTTAAGTACTAAATGTATTCTCTTTTGGCCACATATAAAATAATGGAGTAGAACTAAAAG    |
| AAAAAGAAAATTAATTATATAAATATAACCTCCAACCGTATCAAAATTATTGTCGGGAGCGAA      |
| GAATTAATAAAAGCGGGGCCAGTTATAGCTGCAGCTAAACAATATAAATATTCTCTATGGGTAT     |
| ATTCTTTTTTTTTAACTTTTCGTAAAAAAGTGAAACAATTAATTGGATATCATAAAAGAAATATA    |



---

ACGATTATATGAGACGGATGGAGTAATATTTTATTATAAAAATTGATTTTGTGTATCATTAATAATG  
ATTAAGATCGTGCAATAAATGTCAAGTTGTATGGTACGAGGTACATTTTGTACTAGACAATCT  
GAACATAATTGACAAAGAGGACCCAATGATGTGATAAAGAAGATTCAATGGTGGTGTCTATT  
GTTGACCTTCCTGACTCATTATCTCAAGACCATGATTGGGGACTAAATTAAATTGCGTTTTGCA  
GCATATATGTATACAAACATATTCGTAAACATTTTTTTTTTAAACATAGCCCTAAAAGTTGTGTT  
CAAAGTATTCACACATGAAATAATTGTTTGTATCTTTACCGTTTACTCTCTATAAATTACCTTTAC  
TCTCAGTAAATTACCTCTTTCAATCGACTTTATTTATGACCAGATGAACATCTTTTTACATTTTAA  
ACTTAACCCTAAATGCTATATATCGGATTTTTTTTTTACATGTGTAACAAGCATATAAACACGCGT  
GTACTATTTGAAAGGGTTTTAACTATGTCTTTTTACCAGAAATAACTTATGTAAAAAGTCGTAC  
AGAAAGCAATATATCCTACATAAAAAGTGCAGAACTGATTATCTTTATGTGGATCCCATATCTTT  
CAAATGGGCCTCTATACATGTCTTTTTTATAACTTGCTTTATGATTAACCCCTATTTGAAAAA  
AAGTAGCCCTTTTGTGAACAACGGCTATTATACATGTGGGCTAATTAGTCGCTATCAATTATCA  
AAGGAGGAAATAACTTATAGAAAAGTATCAATATAATGGACCATCCATGGAAGAAGAAATCA  
TCAAACAAATACCACGGTTGAATTTCAATCTATGACAAAATACTCCTTCTGATGTCATCTTTCTT  
AATATATGCACATGTGTTTATGCATATATATACACCAACCCTAAAAATTTCAACAGGGTTTCTGT  
AAACAAAACCTATTAAAAATGGACTCCATTTTCAATCTTGAAGAAACAAAAAGATCTCGCTTG  
CTTCGACAAATCATGGACTCCTTTGGTTTCACTTACATTTGCTTATGGTCTCACTTTTCTCAGCC  
TTCCAAGTACATCTCTCTCATTCAAGCTCAATCTTTTTATATAGTATTCTTTCAGTTCAAAAA  
GAAATGTTTAATCATCTTTGATACCCATGCACAAATTGTAGTTGTTTGATCTTCATTGACGGAGT  
ATACAAAGAAGGAAACAATCAAGCAAGCACATCATCTGGGAGTCTTCCGTGAAGTCATTTCT  
TTGACTACAAAAAGTCGGTGTCTTGATTGATAATTATAGTGGGTAAGAACATAAAAAACACA  
ATCTTTTTTCGTATAATGAGTATTACTAAAACCTCAGTTGTATGCGAGGGGTTTTAACTGAATAAT  
TAATGTTTTTTTATTAGAGGAGTTCCTGGGTTTGCATTCATGCACAATATTACATACATGGAGCG  
GAATGAGTTGGAGCTCTTAAATCTGGCATCAAATTTGCACAGCTACAATTTTATCAAGTAATC  
ACACTTCAT

>*CmbHLH18*

GTGTAGTCTTTTGGAGTAAAAACCTAAACCGAACCAAGGCTGTCTTGTACAGTATTTTATAGGG  
TTCCAAACCCTATCTTACCACAAGATAAGTGCTTTACTTCATTAATTCAATTATGTCTTCAATTAT  
TTGTGTGTATGCTTGCATGTTCTCCATGTCCGGCTAATTTACTTGTGTGTTTGCTTAGGGAATATG  
AACTTGATTATTGAATATTGATTGGTTGTCTCTTATCTTAATTGTTAATGATCTAGTAATGCGAT  
AGGTCATTTGTTGTGTAGTTAATGCTTGATTAATCTTTGTGAACCTTAGGCTATAACACCTAGAG  
TAGTTGTAAGCTAAACCATCCAAAGAGTACCTTAGAGTTAGAGTTTATAATTCCTAGAGATTTT  
GTAGACGAGACCCCTTTGGTAGTTTCAAAGAGTTAGGGATAAACGCATACCCTACGACTTTAGA  
CACACAACGCGATTAAGAATAAGGACGTGACAATTCAACCATCAATAGGAGATAATTAAGGA  
GTAATAAACCTAAATAAACACATCTTTAACTATCATACGAGCACACAATAATTAGACATAG  
ACTACATACACCTTAGACTAGATAATTAGACAAGTAGAGTAATCGGTAGAAATACCAACCCCC  
AAATCCAAACCCCGAGATTCGTATCTTTCTAATTCCTAAAAAACATAAAAAAGATAAAAAATAA  
TCTTCCTCAACCCCATCCTTAGCGTAGTAACTTCTCACTAGCATTCTATTCCCCTAGAGAGCG  
ATATCAATACCCGTGGCTTACCCTAATACTATACTACAACGATTAGGTTCACTGCCTAGGGTGT  
ATAAACTTGCTCGAAGAAAAGGAAGTTCCTTTGACCCCGAACGCGCTGCGTAAGCGTATCA  
GGTATTCTTGAAAAAGAGGGTTATACTATGAAGATGCAAAGGGGTACAGTAAAGGTGATCAA  
AGGTTGTCGGGTATGATGATTGAGATCAGGAGAAAGAATTGTGTATATACTCTGGAAGCAAA  
AGTGATGACATTTAGTGACAAAAGCATGAAGATTCAAAACAAGTTGGATTGAGAAAACCTTG  
GTTCTAGACAAGTTAGGTTCAAACAACCTTGGTCCCGGTGCTAAACAGAAATCTATGGAATAC

---



---

ATGATGAAAAACATTTTTGGTTTATGGTGGAACGCGAGGAAGCTGGGGTTATTCAAGATAGTA  
ATGATAATGTTGCGAGTAAGTCAAAAGACAGTTGGAGGATAAGTAAGTGAAGAAAAAGAAAA  
AAAGGACTGATTTGCAAAGGAGCATGAAAGGTTAAACCTTGGTGCAAAGTGGGGGCGCACA  
CTATAAAAGTACTAGAGTACCCGGTTAAGAGGATGTAGTAGAGGGTAATGTTGTTGGGGAAAAA  
AAAAAGAAATGGAAGGAGTCTAAGAAAGCCAATATAGGAAAATTACTGAAGTACAATGCCT  
AGTCGACAAGGTGGTCCTCGCTTCAAGGTTCCAGTACAAGGATTAGTTATATTTAAGTGTTACT  
CCAAAGATGAAAATTGTAGAACATTAGGAGCAAGCTTCACATAGATTAGGGGTTTAAGTGTAC  
AATTAATTAGATTAGGTTTAGACTATAACTAGGATTAATTTGCTTGCCTTGTAAATGCAAGTAAAA  
AATATAATGTAAGCGTTTGAGGCGTTTGAGGTTACGCGTGTGGTTCTCTTGAGTCAATATGCGC  
GCTGGTTTTCAAAGTTTGTGGTTTTTTATCCAACAAAATTAAAATGGATATGACGCCAAAATG  
AAAGACCTGTGAGTAGGTGTCCAAATCATCCCAGAAAATATAAATTTCAAAGTGCTCATACA  
TGCTTTTTGTAAAGCTTCGGGTCAAGATTGCCAACTTTATTTTTTATTAAGATTCTTTTAA  
TTCTAGCAACCTTATAAGAACATAGCACCATTGTTTAAACAAAATGTCTTCAATTTCTACACCCC  
TAAAATTTTGAGGCTATACTGGTTCAACAACATCTTTTAGATATCTAAAGCTTCAAGACAAAAT  
CCTCGAACTAAGAAACACAAATTCTGATTAT

>CmbHLH28

TTGATAATTATAGTGGGTAAGAACAATAAAAAACACAATCTTTTTTTGTATAATGAGTATTACTAA  
AAATCAACTGTATGCGAGGGGTTTTAACAGAATAATATTATTATTAGAGGAATTCCAGGGTTT  
GCATTCATGCACAATATTACATACATGGAGCGGAATGAGTTGGAGCTCTTAAATTTGGCATCAA  
ATTTTGACAGCTACAATTTTATCAAGTAATCACACTTCATATTTAAGTACGTATAAGTTTAGTT  
TCAATTATGTAAGATTGAAGCTAATGTGAATCCCTATTTTATCTTGCAGGAAGCAGGAATAAA  
GGTATCCGATCTAGGCTGCATGGACACGGACACTGTCCAAAGACGGCGATAAGCAAAATCTA  
AAAATATAAGACCTTACATGGACGGGAATTTATATATATATATATATAATTCAAAAGTCTTTG  
TCGTGTTTACCTTACAATTTTATTGAAATTCATTTAATACATAAAGTATTAAAAAAATTAGAGTT  
TCATTTTACTATACATTGAATTTTGTGTTAGTTTATTAATAAAATCAGATAAGATGCTGAATGGAAT  
TTCAAAAAGTTGTATGTAGAATTCTGAGTTTTTGAACAACATATATAACTCTCAGTTTTTCTTTT  
TAAATAAACCTCAAGTCTCAAACCAAAGATTTTGAGCAACATATATAATATTAGAGTTAACTTT  
GTTTAGTATTGATATTTGAAGGGGCCAAAATCAAACCTTCACAGTTAAATATAGTGACAAAGGA  
TAAAGCTTTCTCTTGGCCCTCAAATAAACACGTATATGACTTTGGGTCATCTTCCCATCAAAG  
AAAAAACTTGTGTTTTTTAAGCCTTTACTGATAAACCCATTACCTTATAAAGTGATGTTTATTA  
TCATAAACACAATAAGAGGTGAGCCAAAGGCAAAGAGGTAATCAAGTTTTTGAAAACCTTA  
TTTTCTTTATTTTTTTTTCAAAAAAGAATTCAAATCCGTGTCCAAATCCGTGTCCGGCCGTGTCC  
AGTGGCGGAGCCAGGAAATGTAAGTATGGGGGGCGGTGAGCAATGAGAAGAGAGAAATATT  
TTTTATTTTCGTGTAACCTTCTAAACAATCGGGTCGGGTCGGATTTAGTTAAGAGCAAAACACTC  
TAATTCGAAGCAATTAACACTAATAAGAGGTGTAGGTGTCTATAAAATGAAACTTTGTTTATGT  
GGGTAATATCAACCAGTTTACCATAAAAGTACTGCGCTTATATTATCAATTACTTAGACGAGA  
GTCCGAGACAAACAAAACATCGCTCAAATGTTTTATTGTATTTTAACTTATCATAAAACCATA  
ATAAATATCAATAGCATAACTAAAATCTTGAAAAATAATTTATTATTAGAAAGCAAAGGAAA  
CTTACTGTAAAGTGATTGTTAGTGGCAATTGTATTACTACAACATTTTTTTGCTAACTTACTTAT  
CAAACAATATGTACTGCTGGTACTATTTAAATAAGTAAACTACCTTTTGTATGTTAGTATTAGAT  
AATGAAATGAATAATACACAGATCCAGCAGTCACAAGCCTAAACTCTTGGTCTCCACTTATCC  
TCTTCCCATCTTATCTTTCCCATATTTCACTCACCCCATAAAACAAAACCAGAAACCATAAA  
GAGAAGAAAAAAAGCCATTGCTAAGTTTGTGAGTGGCAAAATTCAATCCAAGAGCACTTGT  
TGTTGGCTTCCACTCACAAGTGAGGGCACTGGAAATTTTGAGCTGAGGGCACTTACTGTTTTA

---



---

ACACCATATTTGCATTTTTGTTCTTACTAGTTTACTGTATCTACAAGAACATGGTTGGGGGCGCT  
TCCCCCACTACCTTCTACATAGCTCCGCCCTGGCCGTGTCCGACCCAAACAGCACGTGGAA  
CACGGCACATGCGTGTCCGACACGTGTCCGAGCCGTGTCCGTGTCCGACACTGCCACGCCTT  
ACTTGGAGCTGTGTCCGTGCTTCTAGTATCCGATATATGTACTCATTTCTTTTTTAGCTAATTTT  
CGTTAAGGATCTTGCGAAATAGCTAGGCTAAAAATAAATTGATCAAGTTGTAGTACTTCGTGCG  
CGTTCAAAAAAAAAAAAAAAAAAATTGTAGTACTTCGTATTTGATTTATTGATCACATATACAATG  
ATGATGATAAACTTCCATTACAGACTGCAATATTTATGGGGAGC

>*CmbHLH30*

CTCTCTATAAATTACCTTTACTCTCTGTAAATTACCTCTTTCAATCGACTTTATTTATGACCAGAT  
GAACATCTTTTTACATTTTAACTTAACCCTAAATGCTATATATTGGATTTTTTTATTCTTTTTACG  
TGTTTAAACAAGCATATAAACACGCGTGTACTATTTGAAAGGGTTTTTAACCTAGAAAAAGACA  
AAATTAAGTATAATAAAAAAGCAGAAAGATATAGGACTTACATAAAAGATGTAATCAGATTT  
TTTATGTGATCCCCATGCATTTTCATGGCCTCTACGTATTTTTTCGCATGTTAAAACCTATTTGA  
AAAGTAGCCCTTTTGTGAACAACGGCTATTATACATGTGGGCTAATTAGTCGCTATCAATTATC  
AAAGGAGGAAATAAATTATAGAAAAGTATCAATATAATGGACCATCCATGGAAGAAGAAATC  
ATCAAAACAATACCACGGTTGAATTTCAATCTATGACAAAATACTCCTTCTGATGTCACTTTTC  
TTGATATATGCACATGTGTTTATGCATATATATACACCAACCCTAAAAATTTCAACAGGGTTTCT  
GTAAACAAAACCTATTATAAAAAATGGACTCCATTTTCAATCTTGAAGAAACAAAAGATCTCGCT  
TGCTTCGACAAATCATGGACTCCTTTGGTTTCACTTACATTTGCTTATGGTCTCACTTTTCTCATC  
CTTCCAAGTACATCTCTCTCATTCAAGCTCAATTTCTTTTATATAGTATTCTTTCAGTTCAAAA  
AGAAATGTTTAATCATCTTTGATACCCATGCACAAATTGTAGTTGTTTGATCTTCATTGATGGAG  
TATACATAGAAGGAAAGAATCATGCAAGCACATCATATGGGAGTCTTCCGTGAGGTCATTTTC  
TTGACTACAAAAGTCGGTGTCTTGATTGATAATTATAGTGGGTAAGAACATAAAAAACACA  
ATCTTTTTTCGTATAATGAGTATTACGAAAACCTCAATGTATGCCAGGGGTTTTAACTGAATAAT  
GTTATGTTATTAGAGGAGTTCCAGCGTTTGCATTCATGCACAATATTACATACATGGAGCGGAA  
TGAGTTGGAGCTTTTAAATTTGGCATCAAATTTGCACAACCTACAATTTTATCAAGTAATCACA  
CTTCATTTATAATTAGTATTAGTTTAGTTTAATCCATGTTAAAGTTGAAGCTAATGTGTATCCCTA  
TTTTATCTTGCAGGAAGCAGGGATTAAGGTATCCAATATATGTACTCAATTCGTTTTTAGCTAAA  
AAATCAATTGATCAAGTTGTAGTACTTTGTATTTTATTTATTGATCACACATAAAATGATGATTAT  
AACTTCCATTACAGACTGCAATATTTATGGGAGCAGCAATGGAGAGATTGAGCTTGGCATG  
ACCAATGACTCCTCTCAAATAAGAAATGTAATTCACATCTTTCATATTGTGATCCTTTATTCTTC  
GGTATTTATGTTTATTTTCAAGATTATATTAGTCTTATATAATTCGTTTAAATGGTTTAAATTTGGGTTT  
TTTTTTTAAATGTAGATTTTAAACCTTTGAAATCGAGTTGAAGAAGTTGTTTCCAGGTGATTTCC  
CTCAAGGAGTGCTTCCTCAACAACCTTGAGCAAGCTCGGGCCTTATCTTCTTCATCATCTTTAAG  
ATCATTATCAATGGACAACAGCATGGAGAACTCACCATTTCTCTTCAACATGCTTCATTCCACT  
CCTTATATGTCCGAAATGTTTGCTCTCACAGAACCACATATGGAACAACAAGCACCAAATCAA  
AAACCACAGTCAACAACAATATTGAGATCAGAAGATCCTCTGCGGCAAGCTTTACAACAAAT  
TAGAACCTCTCATTGATACCTTCAAGAGAACACGAAGAAGCTGCAATGACAAGAGCAATTC  
TTGCAGTCATTACTTCTACTTCTCTCTACTCCTTCTTCTTCATTTCCATACCAGCCAACCCCT  
AGAGTTGCTAGTGCTTTTAAAGAGACATGGATCAAGTAATTTAGGACCTATTAACAACAGAGTT  
CCAAATCGACAAAATCTTCACAGAAGGTCACTTTCATTCTTCCGAAATCTAAGTGAGGCTCGT  
GCTCAAAGAGATCAA

>*CmbHLH60*

AAAGACTTATCAACACCATCCAGAAGAATCATGCAGCCTGATCATTACATTTATCAGACACG

---



---

CTTAGAGTATACTTCAAGATACTTGCTAAAGTATGTCGAAAGGATCTGGCTGAAGTTCTCAA  
GACGCTTAGGCGGGAGTAATTTGAGATAAGGCAAAACGGGAAAACCCTTGGGAAGATAGAG  
ACTCATCGAGAGTAGGGAAACCAACTTACATGAGGTGTCAGCACAGTAAAGCAACCATAGCC  
ACACGATTGCACGTGTACCTTACTTCCAGTTTGCTTCTAGTTTAGATATCATTGTTCTCTGTAA  
CTACTAACAGTGTATCTCCCTAGTTTATAAAGGGAGGTTAGTAGTAGTGATAAGCAATCGATTC  
CACCCTAGAAACTTCCTTCTCTTCTAAGTGGGATCTTTCTCTTCATAACTTGAAGAGTAACAT  
TTGTCAATTACCGGGGATAGTATTCCGCAACTATCCCTCGTAAAGCCTTCACCTTAACTTCTAAG  
TGAGACTAATACAGACGTAGTGTACAAATGGGTATTATTAGTTGACTCAGGTCAAGATTGTGTA  
AACATGCTCTTATTTCTAATGAACATCGGTTATTTTCATTGCTCAAACCTCTTTTTCATACGTTAC  
ATGGTTTTACACAAAAATATCGGACCAACAATCCAAGTTATTAGTCATCGGTTTCGTTTACCCA  
ATAAACTCGAGAAAAGAGGGTAATTTAATCCAAACAACGATAATCCACAATCTACTTTTTTAA  
GTTGATCAATTATAAAATTCTTTTCAGTTGATGTATCACTTAAAAAAACTTTTGACTAGATAGA  
TAACAAAGTTCTAAAATCGTACGTGATTACACTTTTAGATGTAGTTAAACAAATTTTAACCTA  
TTTAAAAACAATATCCTCCGATTATTGTTTAAATCAAAAGTCCCAGCTTAAATTAGAATCATC  
CCTTCCAAATCACTAATTAATTACCATTTCAAATCAAGTACATAAATAAATCTACTCAATCATAC  
TAAATAAAGCTAAAAATAGGCCTAATTAATTATACTAAACATGAAAAATAAGAAAAGTGAAG  
AGAGGGATTGAAAGCACCGAGTTTGGGTAAGGAATGATGATGACGAAACAAATACTAAACT  
AAAACCCAACCAAAGCTTGTAATAACCCAAATGCTCCTTAACACCCAATAATCTTCGACTAA  
TCTTTGCATGAATGAAACTTTATGTAAATTTAAGATGGTGAAATGAATAAAGTTGCGAACTTTA  
TATTGTAGAAAGCTTAAAAACTTATAAACTTGATTTAAGAACTATATCTTAAATAAATTGCTT  
AAAACTTTAATAAAAAACGTGATACAATTAAGTTTAAAAATAAAAAAGATGCAAGCTTTATAA  
ATTTTAAAGACCAAAAAGGATGACTTTTATAAAAAGATTGAAACTTTATAATTCAAGTCACAA  
ACATCAAAAGAAAATTTACATCATCTGCTCACAAATACTCCAACATAGTCACAAATACTCCAA  
CATATACAAACACCTTATTCGTTGATAATACAAATATGTCACCTTATGTGTGATAAAAGTTGTTT  
TAATCCAAACTATTTAGACACTAGACACTGATATTTTTGCATGTAATATCTTCATTAAAATGCAA  
AAGAATCTTGTGAAATTAGGAAAGAGTAGTTATTAAACGGTTGGGATTAAAACCTTGATGGTGG  
TATTAGGAAACACCAGCCGCCTCAATTGAAACCATTTATCTGAACCTGCCTACTTCCACGTAG  
GATCCTGACACTTATCACTAGCCAGCTAGGTTCTTGTATGTAGTATTGTAGTTTCCTTAAACAT  
CCATGGGCAATTTAGGTATTTAATATTCTTCACAAGAATCTCATGCTTCTATATAAAAGCTACA  
CTTTTCCCACTTCCCCTCTTGCCATTTTCACAAATAGATAACAACAAACAAAACACATTGTGTG  
AAACATACGAATATTTGTTCAAATCCGTAAATTGCGTACATATCTGTCACTAGAGGTACAAAT  
TTGTACGATTCTGATA

---



**Table S2** Number of bHLH TF in each subfamily of chrysanthemum and *Arabidopsis*.

| Subgroup  | Chrysanthemum | <i>Arabidopsis</i> | Rate (Chrysanthemum/ <i>Arabidopsis</i> ) |
|-----------|---------------|--------------------|-------------------------------------------|
| Ia        | 3             | 10                 | 0.30                                      |
| Ib        | 0             | 10                 | 0.00                                      |
| II        | 2             | 4                  | 0.50                                      |
| IIIa+c    | 3             | 5                  | 0.60                                      |
| IIIb      | 1             | 4                  | 0.25                                      |
| IIIe+d+f  | 5             | 12                 | 0.42                                      |
| IVa       | 8             | 4                  | 2.00                                      |
| IVb+c     | 4             | 6                  | 0.67                                      |
| IVd       | 4             | 1                  | 4.00                                      |
| Va        | 0             | 3                  | 0.00                                      |
| Vb        | 6             | 5                  | 1.20                                      |
| VIIa(1)   | 0             | 5                  | 0.00                                      |
| VIIa(2)   | 2             | 8                  | 0.25                                      |
| VIIa(3)+b | 0             | 5                  | 0.00                                      |
| VIIIa     | 3             | 3                  | 1.00                                      |
| VIIIb     | 2             | 6                  | 0.33                                      |
| VIIIc     | 0             | 6                  | 0.00                                      |
| IX        | 5             | 5                  | 1.00                                      |
| X         | 4             | 5                  | 0.80                                      |
| XI        | 2             | 5                  | 0.40                                      |
| XII       | 10            | 17                 | 0.59                                      |
| XIII      | 2             | 3                  | 0.67                                      |
| XIV       | 0             | 5                  | 0.00                                      |
| XV        | 0             | 3                  | 0.00                                      |
| Orphans   | 5             | 16                 | 0.31                                      |
| Total     | 71            | 156                | 0.46                                      |



**Table S3** Proportion of conserved amino acids at each point of CmbHLH protein.

| Amino acid location | Conserved amino acids >50% | Ratio (%) |
|---------------------|----------------------------|-----------|
| 5                   | His, H                     | 55        |
| 8                   | Ala, A                     | 59        |
| 9                   | Glu, E                     | 77        |
| 10                  | Arg, R                     | 68        |
| 12                  | Arg, R                     | 77        |
| 13                  | Arg, R                     | 92        |
| 14                  | Glu, E                     | 52        |
| 23                  | Leu, L                     | 83        |
| 26                  | Leu, L                     | 61        |
| 27                  | Val, V                     | 51        |
| 28                  | Pro, P                     | 76        |
| 35                  | Lys, K                     | 56        |
| 37                  | Asp, D                     | 65        |
| 38                  | Lys, K                     | 59        |
| 39                  | Ala, A                     | 79        |
| 40                  | Ser, S                     | 52        |
| 42                  | Leu, L                     | 82        |
| 45                  | Ala, A                     | 56        |
| 46                  | Ile, I                     | 63        |
| 48                  | Tyr, Y                     | 70        |
| 49                  | Ile, I                     | 54        |
| 50                  | Lys, K                     | 52        |
| 52                  | Leu, L                     | 92        |
| 56                  | Val, V                     | 55        |
| 59                  | Leu, L                     | 75        |



**Table S4** Selection criteria for differential genes.

| Gene ID (name)               | Cm_A3 vs Cm_CK0 |            | Cm_A5 vs Cm_CK0 |            |
|------------------------------|-----------------|------------|-----------------|------------|
|                              | log2FC          | Padj       | log2FC          | Padj       |
| c60363_g1( <i>CmbHLH16</i> ) | 3.9             | 8.29E-12   | 3.7             | 4.40E-16   |
| c61229_g1( <i>CmbHLH18</i> ) | 2.4             | 0.00023616 | 1.6             | 0.0050347  |
| c93607_g1( <i>CmbHLH28</i> ) | 3.5             | 4.53E-19   | 2.7             | 2.4474E-23 |
| c93607_g2( <i>CmbHLH30</i> ) | 4.1             | 3.06E-14   | 3.7             | 1.1979E-20 |
| c77068_g1( <i>CmbHLH60</i> ) | 3.8             | 2.27E-43   | 2.7             | 1.3631E-21 |

Note: Cm\_A3 vs Cm\_CK0 represents the ratio of the expression of this gene at day 3 of inoculation to that at day 0 of inoculation by *Alternaria* sp.; Cm\_A5 vs Cm\_CK0 represents the ratio of the expression of this gene at day 5 of inoculation to that at day 0 of inoculation by *Alternaria* sp. The screening criterion for differential genes is the default value of log2FC is greater than 1 and Padj less than or equal to 0.05.

**Table S5** Relative activity of leaf cells of WT and transgenic chrysanthemum.

| Lines                      | A <sub>600nm</sub>        | Relative cell activity/ % |
|----------------------------|---------------------------|---------------------------|
| WT                         | 1.237±0.178 <sup>a</sup>  | 54.93 <sup>a</sup>        |
| 35S:: <i>CmbHLH18-5-1</i>  | 0.525±0.067 <sup>b</sup>  | 80.86 <sup>b</sup>        |
| 35S:: <i>CmbHLH18-32-9</i> | 0.370±0.040 <sup>bc</sup> | 86.53 <sup>bc</sup>       |
| 35S:: <i>CmbHLH18-14-4</i> | 0.276±0.008 <sup>c</sup>  | 89.95 <sup>c</sup>        |

Note: The different letters signified significant differences at  $p < 0.05$  by one-way ANOVA.

**Table S6** Primers used in this study.

| Primer codes | Forword primer (5'-3')      | Reverse primer (5'-3')    | Purpose                          |
|--------------|-----------------------------|---------------------------|----------------------------------|
| qCmbHLH16    | CTTCAAATGACACCAAC<br>GAGGAT | GAGGCGGGCGGAATACA         | For RT-qPCR in<br>Chrysanthemum. |
| qCmbHLH18    | GGCTGCAATTCAAAGGA<br>TGTTT  | GTCATGCAGAAGTCGTCCG<br>CC |                                  |
| qCmbHLH28    | TTCTGAGATGGCGGTAG           | CGTGGCACATCCTCTTT         |                                  |
| qCmbHLH30    | TGTAGTTGGCATCACCG           | CAAATCCACCAGTATCACA       |                                  |
|              |                             | T                         |                                  |



|             |                                        |                                       |                                                       |
|-------------|----------------------------------------|---------------------------------------|-------------------------------------------------------|
| qCmbHLH60   | CTTCTGATGGCGAGTTT                      | GGTTTGTCCACCTATGTTAG                  |                                                       |
| CiUBI       | AGCTGAGCAGACTCCCCG<br>ATG              | AGGCGAATCATCAGTACCA<br>AGT            | For RT-qPCR.                                          |
| CmbHLH18    | GGTGTCCAAATCATCCCA<br>GAA              | GGATCGGACAAGCAACCGT<br>A              | For isolation and transformation of                   |
| Super1300   | GCCATTTTCGCCTTTTCAG                    | TGATAATCATCGCAAGACC<br>G              | <i>CmbHLH18</i> into vector.                          |
| CmbHLH18-V  | CTAGTCTAGAATGGGAA<br>AGGTATCGAACACGATT | CGGGGTACCAAGAACTTGT<br>TGCAGATTCTTCGA |                                                       |
| CmbHLH18-At | TGAAGTGCAAATGTCAG<br>GGAA              | TACTTCCTACTCCCACCAA                   | For identification of transgenic <i>Arabidopsis</i> . |
| AtActin     | CTAAGCTCTCAAGATCAA<br>AGGC             | AACATTGCAAAGAGTTTCA<br>AGG            | For RT-qPCR in <i>Arabidopsis</i> .                   |
| AtSOD       | TGGAACTGCCACCTTCAC<br>AAT              | GATGCCGCAAGCAACACG                    |                                                       |
| AtCAT       | ACGCCGATTGCGAGATA<br>CA                | CAGACAGGAGCACCCGAG<br>TTT             |                                                       |
| AtPAL       | AAGCCTGAGTTCACCGA<br>TCATC             | TACGAGCTTCGTCGAGGA<br>T               |                                                       |
| AtPOD       | TGCGAGAGACGGTATTGT<br>CA               | TCTCCCAAGTAGCTCCCTCT                  |                                                       |
| AtCHT       | CGGAAACTGGAAACCTA<br>CA                | CAGTTGAAGGGTTGAAAGG                   |                                                       |
| AtGLU       | GCAATGCAGAACATCGA<br>GAA               | TCATCCCTGAACCTTCCTTG                  |                                                       |
